# Supplementary material for: First row wheels, {(tBu3SiS)MX}12(M = Co, X = Cl; M = Ni, X = Br), are common amongst both simpler and more complex aggregates
Source: Royal Society of Chemistry journal article supplement (doi:10.1039/b311212h), 2004-01-01

**Supplemental Material to:**

**First row wheels {(tBu3SiS)MX}12 (M = Co, X = Cl; M = Ni, X = Br) are common amidst simpler (e.g., [(tBu3SiS)Ni]2(µ-SSitBu3)2) and more complex (e.g., [(µ-SSitBu3)Ni]5(µ­5-S)) aggregates**

Orson L. Sydora,*a* Peter T. Wolczanski*,*a* Emil B. Lobkovsky,*a* Evan Rumberger*b* and David N. Hendrickson*b*

*aDepartment of Chemistry &Chemical Biology, Baker Laboratory, Cornell University, Ithaca, New York, USA 14853, E-mail: ptw2@cornell.edu*

*bDepartment of Chemistry and Biochemistry, University of California, San Diego, San Diego, California, USA 92083, E-mail: dhendrickson@ucsd.edu*

**Fig. 4.** Molecular view of the wheel {(tBu3SiS)NiBr}12 (C6H14)n (**5**); *d*(Br...Br) = 9.583 (8), 10.750 (8) Å and it is approximately *C*6v; its asymmetric unit is 1/6 of a wheel.


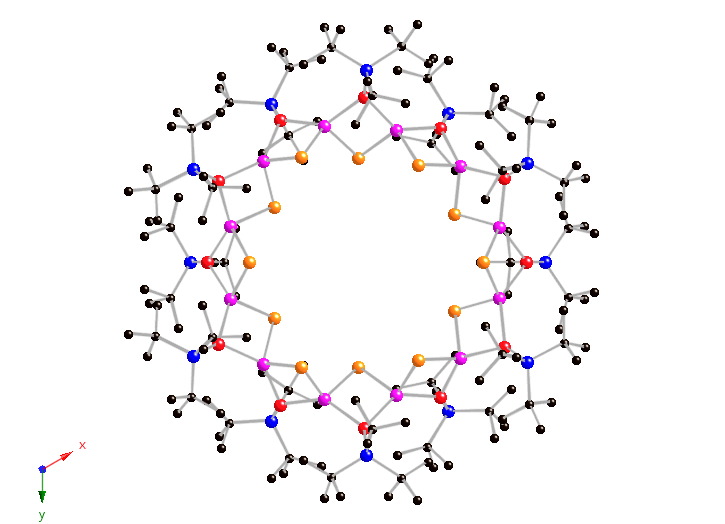

Supplement: b311212h.doc [file b311212h.doc]
